# Supplementary material for: Mixed lead source precursors for producing light absorption layers of perovskite solar cells
Source: Royal Society of Chemistry journal article supplement (doi:10.1039/d0ra08077b), 2021-01-01
Supplement: d0ra08077b1.pdf [file d0ra08077b1.pdf]

## Supporting Information

### Mixed Lead Source Precursors for Producing Light Absorption Layers of Perovskite Solar Cells

Honggang Xie<sup>†a</sup>, Bo Zheng<sup>†a</sup>, Can Gao<sup>a</sup>, Jiannan Xu<sup>a</sup>, Jiejing Zhang<sup>a</sup>, Chunxiao Gao<sup>b</sup>, Xizhe

Liu<sup>\*a</sup>

<sup>a</sup>Institute of Atomic and Molecular Physics, Jilin Provincial Key Laboratory of Applied Atomic and Molecular Spectroscopy, Jilin University, Changchun, 130012, China

<sup>b</sup>State Key Laboratory for Superhard Materials, Jilin University, Changchun, 130012, China.

\*Corresponding author. E-mail address: (X.Liu) [liu\\_xizhe@jlu.edu.cn](mailto:liu_xizhe@jlu.edu.cn)

<sup>†</sup>H.Xie and B.Zheng contributed equally in this work.

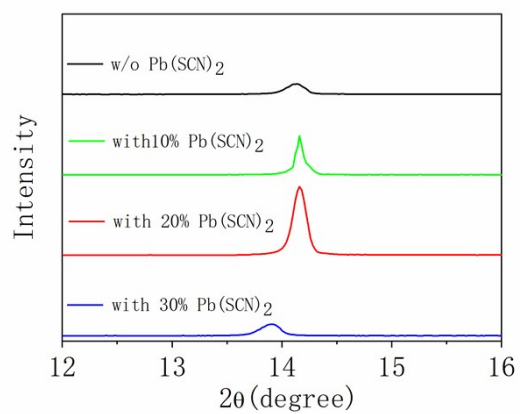

Fig.S1. The enlarged XRD patterns of perovskite layers prepared by  $\text{Pb}(\text{AC})_2$  precursors without and with different  $\text{Pb}(\text{SCN})_2$  additives.

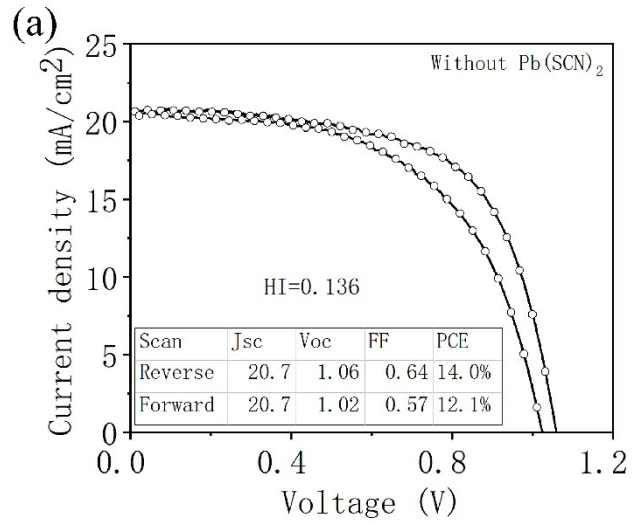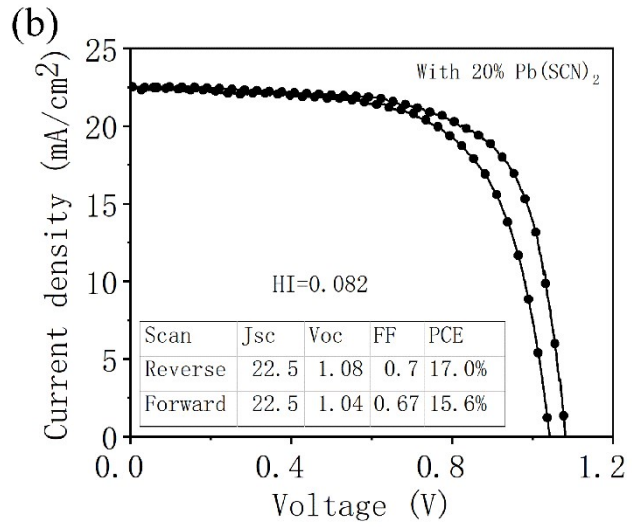

Fig.S2. Reverse scanning and forward scanning J–V curves of devices without (a) and with (b) 20%  $\text{Pb}(\text{SCN})_2$  additives.

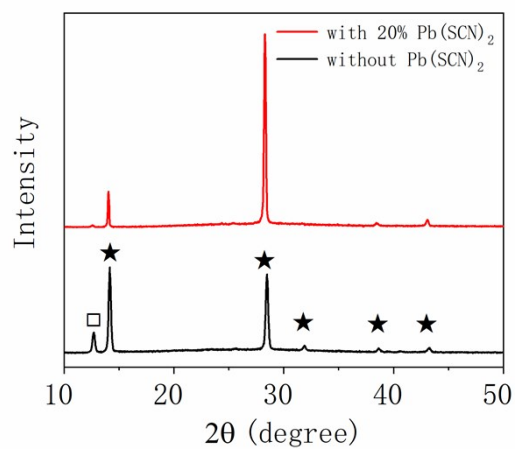

Fig.S3. The XRD patterns of perovskite layers on glass substrates after 24 hours 80 °C thermal aging in N<sub>2</sub> atmosphere under dark, the diffraction peaks of CH<sub>3</sub>NH<sub>3</sub>PbI<sub>3</sub> and PbI<sub>2</sub> are labeled with stars and square, respectively.
